# Supplementary material for: Whole mitochondrial genome analyses of Han population from Shandong of China using massively parallel sequencing
Source: Front Genet. 2024 Nov 29;15:1513412. doi: 10.3389/fgene.2024.1513412 (PMC11638193; doi:10.3389/fgene.2024.1513412)
Supplement: Supplementary file 1 [file Table2.xlsx]

## Sheet: Table S2
Supplementary Table S2. Distribution of point heteroplasmy along the whole mitochondrial genomes in 141 Shandong Han individuals.
Ref->Var	Sample Name	N_Sample (MAF Freq>=15%;Cov>=100)	Heteroplasmy
152T->C	SD099	1	TRUE
191A->G	SD040	1	TRUE
574A->C	SD020 SD129 SD055 SD057 SD080	5	FALSE
1007G->A	SD089	1	TRUE
1041A->G	SD138	1	TRUE
1393G->A	DH017 DH027 DH028	3	FALSE
1405C->T	DH017 DH134 DH027 DH028 DH142	5	FALSE
1462G->A	SD031	1	TRUE
3206C->T	SD028	1	TRUE
4295A->G	SD087	1	TRUE
5442T->C	SD085	1	TRUE
6392T->C	SD008	1	TRUE
7148T->G	SD079	1	TRUE
8701A->G	SD017 SD082	2	FALSE
9296C->T	SD032	1	TRUE
10511C->T	SD047	1	TRUE
11061C->T	SD097	1	TRUE
14962C->T	SD059	1	TRUE
16140T->C	SD016	1	TRUE
16309A->G	SD114	1	TRUE
