# Supplementary material for: Whole mitochondrial genome analyses of Han population from Shandong of China using massively parallel sequencing
Source: Front Genet. 2024 Nov 29;15:1513412. doi: 10.3389/fgene.2024.1513412 (PMC11638193; doi:10.3389/fgene.2024.1513412)
Supplement: Supplementary file 2 [file Table3.xlsx]

## Sheet: Table S3
Supplementary Table S3. The reference populations used in PCA and Network analysis.
Population	Location	Size	Ancestral component	Abbreviation	Reference
Chinese Dai in Xishuangbanna	Chinese Dai in Xishuangbanna, China	99	East Asian	CDX	1000 Genomes Project
Han Chinese in Bejing	Han Chinese in Bejing, China	103	East Asian	CHB	1000 Genomes Project
Southern Han Chinese	Southern Han Chinese, China	108	East Asian	CHS	1000 Genomes Project
Japanese in Tokyo	Japanese in Tokyo, Japan	104	East Asian	JPT	1000 Genomes Project
Kinh in Ho Chi Minh City	Kinh in Ho Chi Minh City, Vietnam	101	East Asian	KHV	1000 Genomes Project
Utah residents	Utah residents with Northern and Western European ancestry	99	European	CEU	1000 Genomes Project
Finnish	Finnish in Finland	99	European	FIN	1000 Genomes Project
British	British in England and Scotland	92	European	GBR	1000 Genomes Project
Iberian	Iberian populations in Spain	107	European	IBS	1000 Genomes Project
Toscani	Toscani in Italy	108	European	TSI	1000 Genomes Project
Bengali	Bengali in Bangladesh	86	South Asian	BEB	1000 Genomes Project
Gujarati Indian	Gujarati Indian in Houston,TX	106	South Asian	GIH	1000 Genomes Project
Indian Telugu	Indian Telugu in the UK	103	South Asian	ITU	1000 Genomes Project
Punjabi	Punjabi in Lahore,Pakistan	96	South Asian	PJL	1000 Genomes Project
Sri Lankan Tamil	Sri Lankan Tamil in the UK	103	South Asian	STU	1000 Genomes Project
Yakut	Siberia, Asia	25	North Asian	Yakut1	HGDP
Bedouin	Israel (Negev), Middle East	46	West Asian	Bedouin	HGDP
Druze	Israel (Carmel), Middle East	42	West Asian	Druze	HGDP
Mozabite	Algeria (Mzab), North Africa	29	West Asian	Mozabite	HGDP
Palestinian	Israel (Central), Middle East	46	West Asian	Palestinian	HGDP
Manchu	Manchu, Liaoning	93	East Asian	Manchu	1
Mongolian	Mongolian, Mongolia	147	East Asian	Mongolian	2
LowlandKyrgyz	LowlandKyrgyz, Xinjiang	54	Central Asian	LowlandKyrgyz	3
Tajik	Tajik, Xinjiang	80	Central Asian	Tajik	4
Ami	Ami, Taiwan	50	East Asian	Ami	5
Evenk	Evenk, Russia	129	North Asian	Evenk	6
Ket	Ket, Russia	34	North Asian	Ket	7
Koryak	Koryak, Russia	84	North Asian	Koryak	6,7
Yukaghir	Yukaghir, Russia	20	North Asian	Yukaghir	6
Han, Anhui	Anhui,China	738	East Asian	Han_ Anhui	5
Han, Hebei	Hebei,China	1099	East Asian	Han_ Hebei	5
Han, Heilongjiang	Heilongjiang,China	437	East Asian	Han_ Heilongjiang	5
Han, Henan	Henan,China	1016	East Asian	Han_ Henan	5
Han, Hongkong	Hongkong,China	18	East Asian	Han_ Hongkong	5
Han, Hubei	Hubei,China	900	East Asian	Han_ Hubei	5
Han, Jiangsu	Jiangsu,China	2471	East Asian	Han_ Jiangsu	5
Han, Jiangxi	Jiangxi,China	497	East Asian	Han_ Jiangxi	5
Han, Jilin	Jilin,China	381	East Asian	Han_ Jilin	5
Han, Liaoning	Liaoning,China	646	East Asian	Han_ Liaoning	5
Han, Beijing	Beijing,China	898	East Asian	Han_ Beijing	5
Han, Neimenggu	Neimenggu,China	176	East Asian	Han_ Neimenggu	5
Han, Ningxia	Ningxia,China	39	East Asian	Han_ Ningxia	5
Han, Qinghai	Qinghai,China	25	East Asian	Han_ Qinghai	5
Han, Shanghai	Shanghai,China	1099	East Asian	Han_ Shanghai	5
Han, Tianjin	Tianjin,China	342	East Asian	Han_ Tianjin	5
Han, Chongqing	Chongqing,China	452	East Asian	Han_ Chongqing	5
Han, Xinjiang	Xinjiang,China	77	East Asian	Han_ Xinjiang	5
Han, Yunnan	Yunnan,China	232	East Asian	Han_ Yunnan	5
Han, Zhejiang	Zhejiang,China	1912	East Asian	Han_ Zhejiang	5
Han, Fujian	Fujian,China	620	East Asian	Han_ Fujian	5
Han, Gansu	Gansu,China	310	East Asian	Han_ Gansu	5
Han, Guangdong	Guangdong,China	1562	East Asian	Han_ Guangdong	5
Han, Guangxi	Guangxi,China	222	East Asian	Han_ Guangxi	5
Han, Guizhou	Guizhou,China	157	East Asian	Han_ Guizhou	5
Han, Hainan	Hainan,China	49	East Asian	Han_ Hainan	5
Ancient_Upper_Yellow_River	Upper_Yellow_River in China	12	East Asian	Ancient_Upper_Yellow_River	8
Ancient_Lower_Yellow_River	Lower_Yellow_River in China	14	East Asian	Ancient_Lower_Yellow_River	8
Ancient_West_Liao_River	West_Liao_River in China	6	East Asian	Ancient_West_Liao_River	8
Ancient_Shandong	Shandong, China	4	East Asian	Ancient_Shandong	9
Reference
[1] Li YC, Ye WJ, Jiang CG, et al. River Valleys Shaped the Maternal Genetic Landscape of Han Chinese. Mol Biol Evol. 2019;36(8):1643-1652. doi:10.1093/molbev/msz072
[2] Zhang X, He G, Li W, et al. Genomic Insight Into the Population Admixture History of Tungusic-Speaking Manchu People in Northeast China. Front Genet. 2021;12:754492. Published 2021 Sep 30. doi:10.3389/fgene.2021.754492
[3] Peng MS, Xu W, Song JJ, et al. Mitochondrial genomes uncover the maternal history of the Pamir populations. Eur J Hum Genet. 2018;26(1):124-136. doi:10.1038/s41431-017-0028-8
[4] Chen Y, Gong L, Liu X, Chen X, Yang S, Luo Y. Mitochondrial DNA genomes revealed different patterns of high-altitude adaptation in high-altitude Tajiks compared with Tibetans and Sherpas. Sci Rep. 2020;10(1):10592. Published 2020 Jun 29. doi:10.1038/s41598-020-67519-z
[5] Ko AM, Chen CY, Fu Q, et al. Early Austronesians: into and out of Taiwan. Am J Hum Genet. 2014;94(3):426-436. doi:10.1016/j.ajhg.2014.02.003
[6] Duggan AT, Whitten M, Wiebe V, et al. Investigating the prehistory of Tungusic peoples of Siberia and the Amur-Ussuri region with complete mtDNA genome sequences and Y-chromosomal markers. PLoS One. 2013;8(12):e83570. Published 2013 Dec 12. doi:10.1371/journal.pone.0083570
[7] Dryomov SV, Nazhmidenova AM, Starikovskaya EB, et al. Mitochondrial genome diversity on the Central Siberian Plateau with particular reference to the prehistory of northernmost Eurasia. PLoS One. 2021;16(1):e0244228. Published 2021 Jan 28. doi:10.1371/journal.pone.0244228
[8] Ning C, Li T, Wang K, et al. Ancient genomes from northern China suggest links between subsistence changes and human migration. Nat Commun. 2020;11(1):2700. Published 2020 Jun 1. doi:10.1038/s41467-020-16557-2
[9] Liu J, Zeng W, Sun B, et al. Maternal genetic structure in ancient Shandong between 9500 and 1800 years ago. Sci Bull (Beijing). 2021;66(11):1129-1135. doi:10.1016/j.scib.2021.01.029
